# Supplementary material for: Core–shell Cu2S:NiS2@C hybrid nanostructure derived from a metal–organic framework with graphene oxide for photocatalytic synthesis of N-substituted derivatives
Source: Royal Society of Chemistry journal article supplement (doi:10.1039/d1ta00159k), 2021-01-01
Supplement: d1ta00159k1.pdf [file d1ta00159k1.pdf]

---

## Supporting Information

### Core-shell Cu<sub>2</sub>S:NiS<sub>2</sub>@C Hybrid Nanostructure Derived from a Metal–Organic Framework with Graphene Oxide for Photocatalytic Synthesis of N-substituted Derivatives

Mohammad Yusuf<sup>a</sup>, Shamim Ahmed Hira<sup>a</sup>, Hyeonhan Lim<sup>a</sup>, Sehwan Song<sup>b</sup>, Sungkyun Park<sup>b</sup>, Kang Hyun Park<sup>a,\*</sup>

<sup>a</sup>*Department of Chemistry, Chemistry Institute for Functional Materials, Pusan National University, Busan, 46241, Republic of Korea*

<sup>b</sup>*Department of Physics, Pusan National University, Busan 46241, Republic of Korea*

E-mail: [chemistry@pusan.ac.kr](mailto:chemistry@pusan.ac.kr)

---

---

## Supplementary Figures

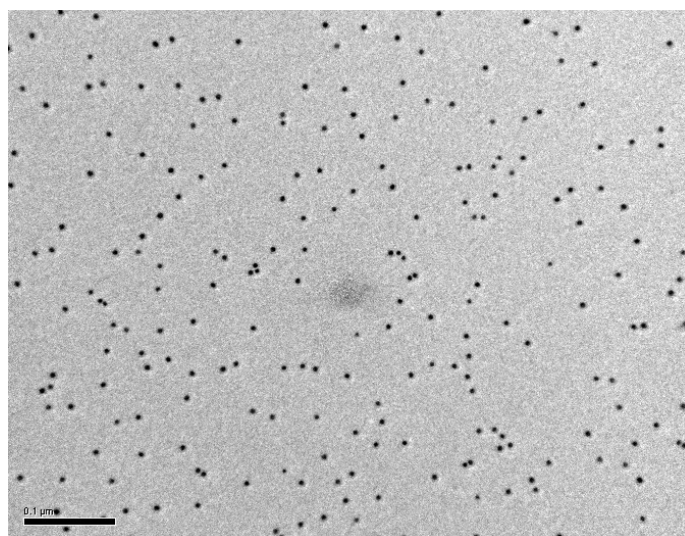

**Figure S1.** The seeding of the Cu:Ni-BTEC by reflux condition.

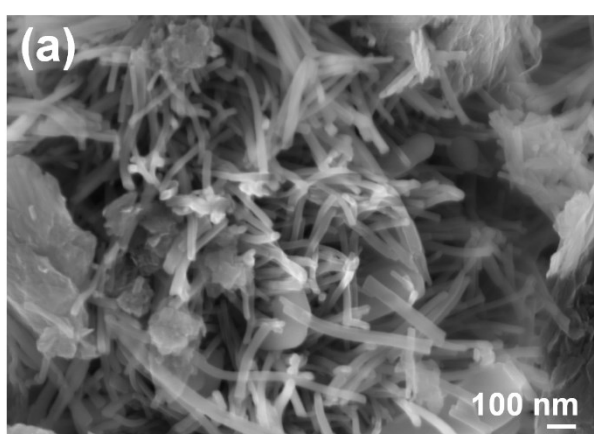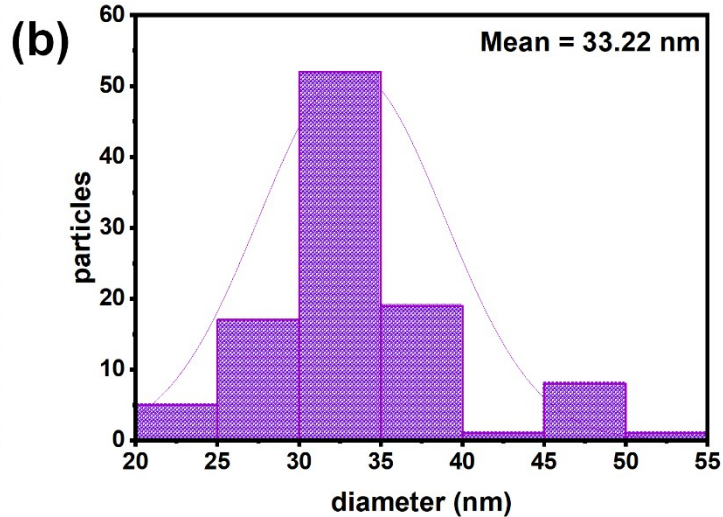

**Figure S2.** (a) SEM images of Cu:Ni-BTEC/GO and (b) histogram distribution diameter of Cu:Ni-BTEC/GO.

---

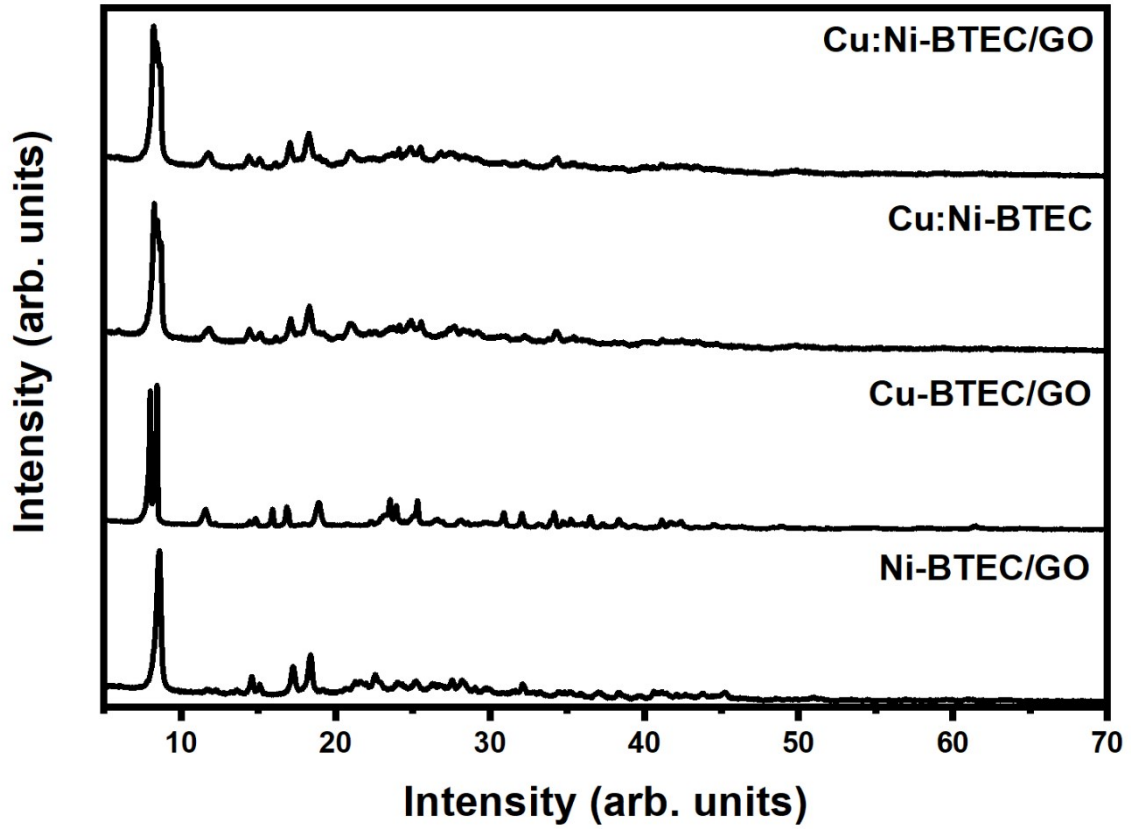

**Figure. S3.** XRD pattern of various Cu:Ni-BTEC/GO

---

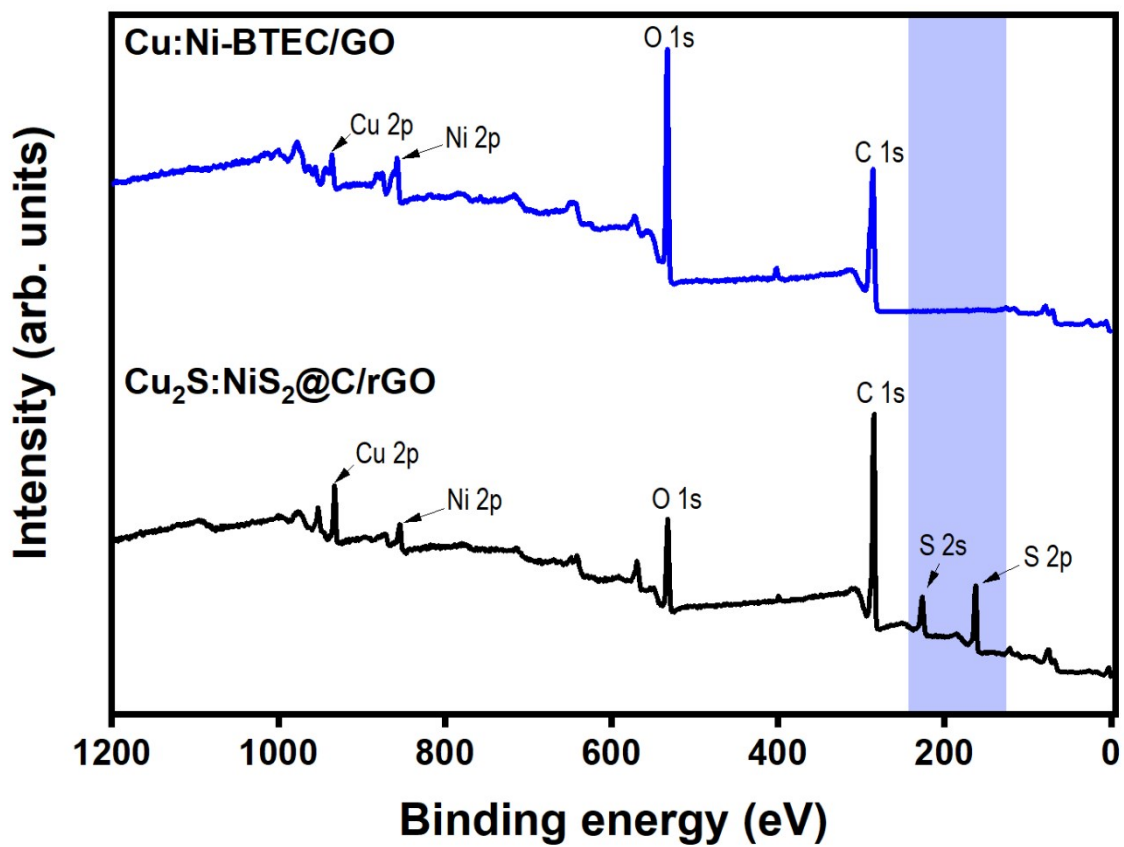

Figure. S4. XPS survey spectrum of Cu:Ni-BTEC/GO and Cu<sub>2</sub>S:NiS<sub>2</sub>@C/rGO.

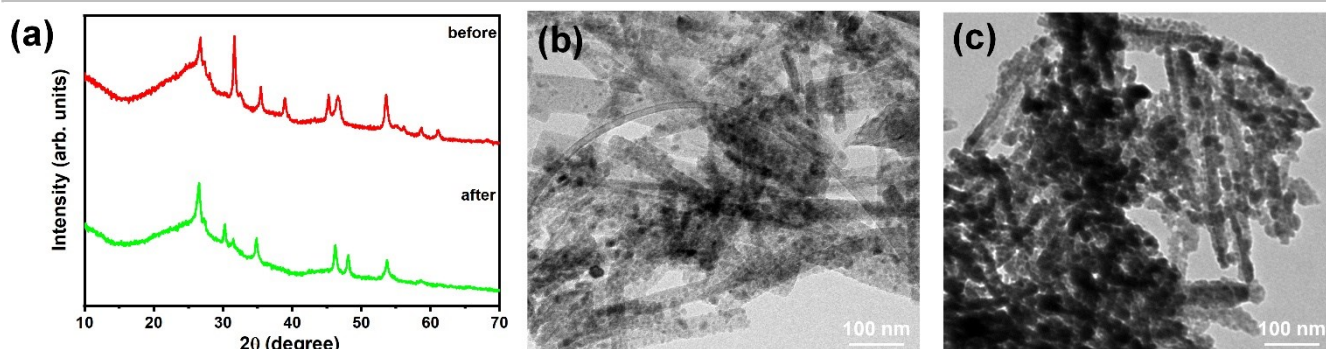

**Figure. S5.** (a) XRD patterns for reusability test of  $\text{Cu}_2\text{S}:\text{NiS}_2@\text{C}/\text{rGO}$ , TEM images of  $\text{Cu}_2\text{S}:\text{NiS}_2@\text{C}/\text{rGO}$  photocatalyst (b) before and (c) after 5<sup>th</sup> cycles.

**Table S1.** The wt.% of elemental analysis in the sample by ICP-OES.

| Catalyst                                               | Cu (wt.%) | RSD (%) | Ni (wt.%) | RSD (%) | S (wt.%) | RSD (%) |
|--------------------------------------------------------|-----------|---------|-----------|---------|----------|---------|
| $\text{Cu}_2\text{S}-\text{NiS}_2@\text{C}/\text{rGO}$ | 21.2      | 1.26    | 17.8      | 2.18    | 14.8     | 0.94    |
| Cu:Ni-BTEC/GO                                          | 13.4      | 1.79    | 11.5      | 1.99    | -        | -       |

**Table S2.** BET surface area, pore volume, and pore diameter of Cu:Ni-BTEC and its derivatives.

| Catalyst                                               | BET surface area ( $\text{m}^2 \text{g}^{-1}$ ) | Pore volume ( $\text{cm}^3 \text{g}^{-1}$ ) | Average pore size (nm) |
|--------------------------------------------------------|-------------------------------------------------|---------------------------------------------|------------------------|
| $\text{Cu}_2\text{S}:\text{NiS}_2@\text{C}/\text{rGO}$ | 131                                             | 0.63                                        | 19                     |
| Cu:Ni-BTEC/GO                                          | 82                                              | 0.42                                        | 20                     |
| Cu-BTEC/GO                                             | 14                                              | 0.03                                        | 9                      |
| Ni-BTEC/GO                                             | 63                                              | 0.17                                        | 10                     |
| Cu:Ni-BTEC                                             | 62                                              | 0.32                                        | 20                     |

The low surface area of Cu:Ni-BTEC is possibly due to the distortion molecule induced by the guest molecule/solvent filling the pore. Result in weak interaction of the framework with  $\text{N}_2$  (low  $\text{N}_2$  uptake) [1–3]. However, different MOFs with a relative low surface area were also reported, as shown in **Table S4**.

**Table S3.** The comparison study for Chan-Lam C-N coupling with other reported catalyst.

| No | Catalyst                                                                               | Structure         | Condition                                                                                          | Additive                               | Light source                                           | Nu. of exa.                                     | Conv. (%) | Rec. <sup>(th)</sup> | Ref.             |
|----|----------------------------------------------------------------------------------------|-------------------|----------------------------------------------------------------------------------------------------|----------------------------------------|--------------------------------------------------------|-------------------------------------------------|-----------|----------------------|------------------|
| 1  | Cu <sub>2</sub> S:NiS <sub>2</sub> @C/rGO                                              | core-shell;hybrid | 1a (0.5 mmol),<br>1b (0.5 mmol),<br>5mg catalyst,<br>MeOH:H <sub>2</sub> O(3:1), 25°C, 6h,<br>air  | -                                      | Xe-lamp<br>(400-800 nm);<br>200 mW/c<br>m <sup>2</sup> | 8,<br>Other C-N<br>oxidative<br>coupling<br>(6) | 91-99     | 5                    | <b>This work</b> |
| 2  | Fe <sub>3</sub> O <sub>4</sub> @SiO <sub>2</sub> /APTES/IMM<br>Ph@Ni <sup>2+</sup> NPs | core-shell;hybrid | 1a (1 mmol),<br>1b (2 mmol),<br>100mg<br>catalyst, H <sub>2</sub> O,<br>25-80°C, 1-6h              | Na <sub>3</sub> PO <sub>4</sub> (1 eq) | -                                                      | 10                                              | 59-85     | 5                    | [4]              |
| 3  | Fe <sub>3</sub> O <sub>4</sub> @SiO <sub>2</sub> -dendrimer-<br>encapsulated Cu(II)    | core-shell;hybrid | 1a (1.2 mmol),<br>1b (1 mmol),<br>10mg catalyst,<br>MeOH, reflux<br>(60-70°C), 1.5-<br>6h          | -                                      | -                                                      | 12                                              | 80-95     | -                    | [5]              |
| 4  | Cu <sub>3</sub> (BTC) <sub>2</sub>                                                     | Conventional      | 1a (0.3 mmol),<br>1b (0.3 mmol),<br>25mg catalyst,<br>EtOH, 60°C,<br>12h, air                      | Et <sub>3</sub> N (0.3 eq)             | -                                                      | 5                                               | 37-92     | 4                    | [6]              |
| 5  | Cu <sub>2</sub> S/TMEDA                                                                | -                 | 1a (1 mmol),<br>1b (2 mmol),<br>34 mg catalyst,<br>MeOH, r.t, 24-<br>48, air                       | TMEDA (1eq)                            | -                                                      | 14                                              | 60-90     | -                    | [7]              |
| 6  | Cu/graphene                                                                            | Conventional      | 1a (1 mmol),<br>1b (1 mmol),<br>50 mg 5 wt%<br>Cu catalyst,<br>MeOH, 25°C,<br>1-6h, O <sub>2</sub> | External O <sub>2</sub>                | Xe lamp                                                | 11                                              | 13-99     | 5                    | [8]              |

|    |                                                               |              |                                                                                             |                                              |                             |    |       |   |      |
|----|---------------------------------------------------------------|--------------|---------------------------------------------------------------------------------------------|----------------------------------------------|-----------------------------|----|-------|---|------|
| 7  | Polymer supported copper(II) complexes                        | -            | 1a (0.375 mmol), 1b (0.25 mmol), 10 mol % Cu(II) ions, EtOH, 70°C, 8h                       | Base K <sub>2</sub> CO <sub>3</sub> (0.2 eq) | -                           | -  | 100   | 4 | [9]  |
| 8  | NiO NPs                                                       | Conventional | 1a (1 mmol), 1b (1.5 mmol), 7mg catalyst, H <sub>2</sub> O/EtOH (4:6), 50°C, 1-5            | K <sub>2</sub> CO <sub>3</sub> (2 eq)        | -                           | 9  | 70-83 | 6 | [10] |
| 9  | Cu/g-C <sub>3</sub> N <sub>4</sub>                            | Conventional | 1a (1 mmol), 1b (1 mmol), 140mg 20 mol% catalyst, MeOH, r.t-65°C, 8-12h, air                | K <sub>2</sub> CO <sub>3</sub> (1 eq)        | blue LED (455-460 nm, 10 W) | 19 | 56-95 | 6 | [11] |
| 10 | N-enriched-GO/Cu                                              | Conventional | 1a (1 mmol), 1b (2 mmol), 2 mol% catalyst, EtOH:H <sub>2</sub> O(1:1), 50-80°C, 1.5-5h, air | Base K <sub>2</sub> CO <sub>3</sub> (2 eq)   | -                           | 16 | 40-98 | 5 | [12] |
| 11 | <i>fac</i> -[Ir(ppy) <sub>3</sub> ]-assisted Cu <sup>II</sup> | -            | 1a (0.38 mmol), 1b (0.25 mmol), 2 mol% catalyst, toluene:MeCN (1:1), 35°C, 20, air          | 2,6-lutidine (1 eq)                          | Blue LED                    | 22 | 5-100 | - | [13] |

1a: arylboronic acid,  
1b: aryl amine, entry 2-5 base on imidazole derivatives, entry 9-11 base on aniline derivatives

**Table S4.** Comparison surface area of different MOF

| No | MOF                   | Organic Linker                          | Morphology                 | Size* (nm) | BET surfaces area (m <sup>2</sup> /g) | Ref.      |
|----|-----------------------|-----------------------------------------|----------------------------|------------|---------------------------------------|-----------|
| 1  | Cu:Ni-BTEC            | 1,2,4,5-benzene-tetra-carboxylic acid   | rod                        | 32         | 62                                    | This work |
| 2  | r-MIL-88A             | fumaric acid                            | rod                        | 100        | 24                                    | [14]      |
|    | s-MIL-88A             |                                         | Spindle                    | 150        | 20                                    |           |
|    | d-MIL-88A             |                                         | Diamond                    | 200        | 12                                    |           |
| 3  | Ni:Co-BDC             | benzene-1,4-dicarboxylic acid           | long-sheet                 | -          | 50                                    | [15]      |
| 4  | Co-BDC (MOF-71)       | benzene-1,4-dicarboxylic acid           | shale-shaped microcrystals | -          | 21                                    | [16]      |
| 5  | ZIF-L                 | 2-methylimidazole                       | leaf-like                  | -          | 67                                    | [17]      |
| 6  | Mn-BDC                | 1,4-benzenedicarboxylic acid            | laminar                    | 5          | 5                                     | [18]      |
| 7  | MIL-88A               | fumaric acid                            | hexagonal nanorod          | 400-600    | 15                                    | [1]       |
|    | Ni-MIL-88A Ni/Fe(1:3) |                                         |                            | 400-600    | 37                                    |           |
|    | Ni-MIL-88A Ni/Fe(3:1) |                                         |                            | 400-600    | 56                                    |           |
| 8  | MIL-53(Fe)            | benzene-1,4-dicarboxylic acid           | sheet                      | -          | 29                                    | [19]      |
|    | MIL-53(Fe)-3H         |                                         | spindle                    | 2000       | 40                                    |           |
|    | MIL-53(Fe)-5H         |                                         | hexagonal spindle          | 3000       | 35                                    |           |
|    | MIL-53(Fe)-10H        |                                         | short columns              | 5000       | 30                                    |           |
| 9  | aMIL-88B a(amorphous) | terephthalic acid and 2-methylimidazole | spindle                    | 90         | 60                                    | [20]      |

\*particles size base on width

## Reference

- [1] X.F. Lu, L. Yu, X.W. Lou, Highly crystalline Ni-doped FeP/carbon hollow nanorods as all-pH efficient and durable hydrogen evolving electrocatalysts, *Sci. Adv.* 5 (2019) eaav6009. doi:10.1126/sciadv.aav6009.
- [2] L. Zhang, Y.H. Hu, Structure distortion of Zn<sub>4</sub>O<sub>13</sub>C<sub>24</sub>H<sub>12</sub> framework (MOF-5), *Mater. Sci. Eng. B Solid-State Mater. Adv. Technol.* 176 (2011) 573–578. doi:10.1016/j.mseb.2011.01.014.
- [3] X. Liu, L. Zhang, J. Wang, Design strategies for MOF-derived porous functional materials: Preserving surfaces and nurturing pores, (2020). doi:10.1016/j.jmat.2020.10.008.
- [4] M. Shahabi Nejad, N. Seyedi, H. Sheibani, S. Behzadi, Synthesis and characterization of Ni(II) complex functionalized silica-based magnetic nanocatalyst and its application in C–N and C–C cross-coupling reactions, *Mol. Divers.* 23 (2019) 527–539. doi:10.1007/s11030-018-9888-2.
- [5] M. Esmaeilpour, A.R. Sardarian, H. Firouzabadi, Dendrimer-encapsulated Cu(II) nanoparticles immobilized on superparamagnetic Fe<sub>3</sub>O<sub>4</sub>@SiO<sub>2</sub> nanoparticles as a novel recyclable catalyst for *N*-arylation of nitrogen heterocycles and green synthesis of



- 
- 5-substituted 1 *H* -tetrazoles, *Appl. Organomet. Chem.* 32 (2018) e4300. doi:10.1002/aoc.4300.
- [6] N. Anbu, A. Dhakshinamoorthy, Cu<sub>3</sub>(BTC)<sub>2</sub> metal-organic framework catalyzed N-arylation of benzimidazoles and imidazoles with phenylboronic acid, *J. Ind. Eng. Chem.* 65 (2018) 120–126. doi:10.1016/j.jiec.2018.04.020.
- [7] K. Janíková, L. Jedinák, T. Volná, P. Cankař, Chan-Lam cross-coupling reaction based on the Cu<sub>2</sub>S/TMEDA system, *Tetrahedron.* 74 (2018) 606–617. doi:10.1016/j.tet.2017.12.042.
- [8] Y.L. Cui, X.N. Guo, Y.Y. Wang, X.Y. Guo, Visible-light-driven Photocatalytic N-arylation of Imidazole Derivatives and Arylboronic Acids on Cu/graphene catalyst, *Sci. Rep.* 5 (2015) 12005. doi:10.1038/srep12005.
- [9] A. Bukowska, W. Bukowski, K. Bester, K. Hus, Polymer supported copper(II) amine-imine complexes in the C-N and A<sup>3</sup> coupling reactions, *Appl. Organomet. Chem.* 31 (2017) e3847. doi:10.1002/aoc.3847.
- [10] T. Krishnaveni, K. Lakshmi, K. Kadirvelu, M. V. Kaveri, Exploration of Catalytic Activity of Quercetin Mediated Hydrothermally Synthesized NiO Nanoparticles Towards C–N Coupling of Nitrogen Heterocycles, *Catal. Letters.* 150 (2020) 1628–1640. doi:10.1007/s10562-019-03037-6.
- [11] J.-Q. Di, M. Zhang, Y.-X. Chen, J.-X. Wang, S.-S. Geng, J.-Q. Tang, Z.-H. Zhang, Copper anchored on phosphorus g-C<sub>3</sub>N<sub>4</sub> as a highly efficient photocatalyst for the synthesis of N -arylpiperidin-2-amines, *Green Chem.* 23 (2021) 1041–1049. doi:10.1039/d0gc03400b.
- [12] N. Seyedi, M. Shahabi Nejad, K. Saidi, H. Sheibani, Fabrication of nitrogen-enriched graphene oxide/Cu NPs as a highly efficient and recyclable heterogeneous nanocatalyst for the Chan–Lam cross-coupling reaction, *Appl. Organomet. Chem.* 34 (2020) e5307. doi:10.1002/aoc.5307.
- [13] W.-J. Yoo, T. Tsukamoto, S. Kobayashi, Visible-Light-Mediated Chan-Lam Coupling Reactions of Aryl Boronic Acids and Aniline Derivatives, *Angew. Chemie Int. Ed.* 54 (2015) 6587–6590. doi:10.1002/anie.201500074.
- [14] X. Liao, F. Wang, F. Wang, Y. Cai, Y. Yao, B.T. Teng, Q. Hao, L. Shuxiang, Synthesis of (100) surface oriented MIL-88A-Fe with rod-like structure and its enhanced fenton-like performance for phenol removal, *Appl. Catal. B Environ.* 259 (2019) 118064. doi:10.1016/j.apcatb.2019.118064.
- [15] J.F. Kurisingal, R. Babu, S.H. Kim, Y.X. Li, J.S. Chang, S.J. Cho, D.W. Park, Microwave-induced synthesis of a bimetallic charge-transfer metal organic framework: A promising host for the chemical fixation of CO<sub>2</sub>, *Catal. Sci. Technol.* 8 (2018) 591–600. doi:10.1039/c7cy02063e.
- [16] X. Hu, H. Hu, C. Li, T. Li, X. Lou, Q. Chen, B. Hu, Cobalt-based metal organic framework with superior lithium anodic performance, *J. Solid State Chem.* 242 (2016) 71–76. doi:10.1016/j.jssc.2016.07.021.
- [17] A.M. Nasir, N.A.H. Md Nordin, P.S. Goh, A.F. Ismail, Application of two-dimensional leaf-shaped zeolitic imidazolate framework (2D ZIF-L) as arsenite adsorbent: Kinetic, isotherm and mechanism, *J. Mol. Liq.* 250 (2018) 269–277. doi:10.1016/j.molliq.2017.12.005.
- [18] H. Hu, X. Lou, C. Li, X. Hu, T. Li, Q. Chen, M. Shen, B. Hu, A thermally activated manganese 1,4-benzenedicarboxylate metal organic framework with high anodic capability for Li-ion batteries, *New J. Chem.* 40 (2016) 9746–9752. doi:10.1039/c6nj02179d.
- [19] Y. Zhan, L. Shen, C. Xu, W. Zhao, Y. Cao, L. Jiang, MOF-derived porous Fe<sub>2</sub>O<sub>3</sub> with controllable shapes and improved catalytic activities in H<sub>2</sub>S selective oxidation, *CrystEngComm.* 20 (2018) 3449–3454. doi:10.1039/c8ce00552d.
- [20] C. Liu, J. Wang, J. Wan, Y. Cheng, R. Huang, C. Zhang, W. Hu, G. Wei, C. Yu, Amorphous Metal–Organic Framework-Dominated Nanocomposites with Both Compositional and
-

---

Structural Heterogeneity for Oxygen Evolution, *Angew. Chemie Int. Ed.* 59 (2020) 3630–3637. doi:10.1002/anie.201914587.

---
